# Supplementary material for: Tuning the coordination behavior of an unexplored asymmetric multidentate ligand for developing diverse heterometallic architectures with luminescent and magnetic properties
Source: Royal Society of Chemistry journal article supplement (doi:10.1039/d0ce01298j), 2020-11-23
Supplement: d0ce01298j1.pdf [file d0ce01298j1.pdf]

## Supporting Information

### **Tune the coordination behavior of an unexplored asymmetric multidentate ligand for developing diverse heterometallic architectures with luminescent and magnetic properties**

Xue-Qin, Song<sup>a\*</sup>, Xue-Li Xia<sup>a</sup>, Fu-Qiang Song<sup>a</sup>, Guo-Hua Liu<sup>a</sup>, Li Wang<sup>b,c\*</sup>

a) School of Chemical and Biological Engineering, Lanzhou Jiaotong University, Lanzhou 730070, China

b) College of Chemistry and Chemical Engineering, College of Chemistry and Chemical Engineering, Xi'an Shiyou University, Xi'an 710065, P.R. China.

c) State Key Laboratory of Coordination Chemistry, School of Chemistry and Chemical Engineering, Nanjing University, Nanjing 210093, P.R. China

## Contents

|                                                                                                                                                                                                                                                                                                           |       |
|-----------------------------------------------------------------------------------------------------------------------------------------------------------------------------------------------------------------------------------------------------------------------------------------------------------|-------|
| Materials and General Methods                                                                                                                                                                                                                                                                             | S2    |
| Synthesis of <b>H<sub>3</sub>L</b>                                                                                                                                                                                                                                                                        | S2    |
| Synthesis of <b>Zn<sub>8</sub>Ln<sub>2</sub></b>                                                                                                                                                                                                                                                          | S3    |
| Synthesis of <b>Ni<sub>3</sub>Tb<sub>2</sub></b>                                                                                                                                                                                                                                                          | S3-S4 |
| Synthesis of <b>Ni<sub>2</sub>Tb<sub>2</sub></b>                                                                                                                                                                                                                                                          | S4    |
| Details of Single Crystal X-ray Diffraction                                                                                                                                                                                                                                                               | S5    |
| <b>Table S1</b> Important bond lengths for <b>Zn<sub>8</sub>Nd<sub>2</sub></b> , <b>Zn<sub>8</sub>Tb<sub>2</sub></b> , <b>Zn<sub>8</sub>Dy<sub>2</sub></b> , <b>Zn<sub>8</sub>Er<sub>2</sub></b> , <b>Ni<sub>3</sub>Tb<sub>2</sub></b> and <b>Ni<sub>2</sub>Tb<sub>2</sub></b>                            | S6    |
| <b>Table S2</b> Shape calculation of Ln <sup>III</sup> in <b>Zn<sub>8</sub>Nd<sub>2</sub></b> , <b>Zn<sub>8</sub>Tb<sub>2</sub></b> , <b>Zn<sub>8</sub>Dy<sub>2</sub></b> , <b>Zn<sub>8</sub>Er<sub>2</sub></b> , <b>Ni<sub>3</sub>Tb<sub>2</sub></b> and <b>Ni<sub>2</sub>Tb<sub>2</sub></b>             | S7    |
| <b>Table S3</b> H-bond parameters in <b>Zn<sub>8</sub>Nd<sub>2</sub></b> , <b>Ni<sub>3</sub>Tb<sub>2</sub></b> and <b>Ni<sub>2</sub>Tb<sub>2</sub></b>                                                                                                                                                    | S8    |
| <b>Figure S1</b> Figure S1 <sup>1</sup> H NMR spectra of <b>H<sub>3</sub>L</b> in d <sub>6</sub> -DMSO                                                                                                                                                                                                    | S9    |
| <b>Figure S2</b> IR spectra of <b>H<sub>3</sub>L</b> , <b>Zn<sub>8</sub>Nd<sub>2</sub></b> , <b>Zn<sub>8</sub>Tb<sub>2</sub></b> , <b>Zn<sub>8</sub>Dy<sub>2</sub></b> , <b>Zn<sub>8</sub>Er<sub>2</sub></b> , <b>Ni<sub>3</sub>Tb<sub>2</sub></b> and <b>Ni<sub>2</sub>Tb<sub>2</sub></b> in solid state | S10   |
| <b>Figure S3</b> TGA curves of <b>Zn<sub>8</sub>Nd<sub>2</sub></b> , <b>Zn<sub>8</sub>Tb<sub>2</sub></b> , <b>Zn<sub>8</sub>Dy<sub>2</sub></b> , <b>Zn<sub>8</sub>Er<sub>2</sub></b> , <b>Ni<sub>3</sub>Tb<sub>2</sub></b> and <b>Ni<sub>2</sub>Tb<sub>2</sub></b> from 25 ~ 650 °C                       | S11   |
| <b>Figure S4</b> PXRD patterns of synthesized and simulated <b>Zn<sub>8</sub>Nd<sub>2</sub></b> , <b>Zn<sub>8</sub>Tb<sub>2</sub></b> , <b>Zn<sub>8</sub>Dy<sub>2</sub></b> and <b>Zn<sub>8</sub>Er<sub>2</sub></b>                                                                                       | S11   |
| <b>Figure S5</b> PXRD patterns of synthesized and simulated <b>Ni<sub>3</sub>Tb<sub>2</sub></b>                                                                                                                                                                                                           | S12   |
| <b>Figure S6</b> PXRD patterns of synthesized and simulated <b>Ni<sub>2</sub>Tb<sub>2</sub></b>                                                                                                                                                                                                           | S12   |
| <b>Figure S7</b> 3D supramolecular architecture of <b>Zn<sub>8</sub>Nd<sub>2</sub></b> constructed by intermolecular H-bond                                                                                                                                                                               | S13   |
| <b>Figure S8</b> 3D supramolecular network of <b>Ni<sub>2</sub>Tb<sub>2</sub></b> constructed by intermolecular H-bond viewing along b-axis                                                                                                                                                               | S13   |
| <b>Figure S9</b> Excitation and emission spectra of <b>H<sub>3</sub>L</b> in solid state                                                                                                                                                                                                                  | S13   |
| <b>Figure S10</b> Emission intensity decay curves of <b>Zn<sub>8</sub>Tb<sub>2</sub></b> in solid state monitored at 545 nm                                                                                                                                                                               | S14   |
| <b>Figure S11</b> Emission intensity decay curves of <b>Zn<sub>8</sub>Dy<sub>2</sub></b> in solid state monitored at 487 nm                                                                                                                                                                               | S14   |
| <b>Figure S12</b> Excitation spectra of <b>Ni<sub>3</sub>Tb<sub>2</sub></b> and <b>Ni<sub>2</sub>Tb<sub>2</sub></b> monitored at 546 nm                                                                                                                                                                   | S14   |
| <b>Figure S13</b> Emission spectra of <b>Ni<sub>3</sub>Tb<sub>2</sub></b> and <b>Ni<sub>2</sub>Tb<sub>2</sub></b> upon excited at 440 and 467 nm                                                                                                                                                          | S15   |
| <b>Figure S14</b> M-H curves of <b>Zn<sub>8</sub>Tb<sub>2</sub></b> , <b>Zn<sub>8</sub>Dy<sub>2</sub></b> , <b>Ni<sub>3</sub>Tb<sub>2</sub></b> and <b>Ni<sub>2</sub>Tb<sub>2</sub></b>                                                                                                                   | S15   |
| <b>References</b>                                                                                                                                                                                                                                                                                         | S15   |

## 1. Materials and General Methods.

All chemicals were obtained from commercial vendors without further purification.

Elemental analyses of carbon, hydrogen and nitrogen were conducted on an Elementar Vario EL III analyzer. Infrared spectra ( $4000\sim 400\text{ cm}^{-1}$ ) were obtained with KBr discs on a Thermo Mattson FTIR spectrometer. Thermogravimetric and differential thermal analysis experiments were performed using a TGA/NETZSCH STA449C instrument heated from  $25\sim 650\text{ }^{\circ}\text{C}$  (heating rate of  $10\text{ }^{\circ}\text{C}/\text{min}$ , nitrogen stream). X-ray powder diffraction (XRPD) patterns of the samples were recorded on a X-ray diffractometer (Rigaku D/Max 2200PC) in the  $2\theta$  range from  $5^{\circ}$  to  $50^{\circ}$  at room temperature. Simulation of the PXRD pattern was carried out with the single-crystal X-ray diffraction data (SXRD) using Mercury software (version: 3.10). Emission and excitation spectra in visible region were recorded with a Hitachi F-7000 spectrophotometer equipped with quartz cuvettes of 1 cm path length. Luminescence measurements were performed using a  $2.5\text{ nm} \times 2.5\text{ nm}$  slit width. Luminescence measurements of NIR emission as well as lifetime measurements were carried out on an Edinburgh FLS920 phosphorimeter equipped with a continuous Xe-900 xenon lamp. The absolute emission quantum yields of the compounds were measured at room temperature using a calibrated integrating sphere as a sample chamber, and specpure  $\text{BaSO}_4$  was used as a reflecting standard. Direct-current (dc) magnetic susceptibility measurements were carried out on a Quantum Design SQUID MPMS-XL 7 magnetometer operating between 2 and 300 K for dc applied fields at 1000 Oe. Field dependence of the magnetization at 2~10K magnetic susceptibility measurements on the polycrystalline samples were performed with the same magnetometer at different magnetic fields. The data were corrected for the magnetization of the sample holder and the diamagnetism of the constituent atoms using Pascal constants. All crystalline samples characterized by PXRD, TG, EA, IR, photoluminescence and magnetic studies were obtained from the same batch.

## 2. Synthesis of $\text{H}_3\text{L}$ .

The ligand  $\text{H}_3\text{L}$  was prepared according to the procedures outlined in the literature using 2-hydroxy-1,3-propylenediamine to replace ethaneamine.<sup>1</sup> Yield: 76%. Melting point:  $192\sim 194\text{ }^{\circ}\text{C}$ . Elem anal. Calcd for  $\text{C}_{19}\text{H}_{22}\text{N}_2\text{O}_6$ : C, 60.95; H, 5.92; N, 7.48. Found: C, 61.28; H, 5.96; N, 7.50.  $^1\text{H}$  NMR (500 MHz,  $\text{DMSO-d}_6$ )  $\delta$  13.79 (s, 1H), 12.70 (s, 1H), 8.73 (t,  $J = 5.4\text{ Hz}$ , 1H), 8.06 (s, 1H), 7.49 – 7.43 (m, 1H), 7.02 (d,  $J = 8.0\text{ Hz}$ , 1H), 6.95 (d,  $J = 7.9\text{ Hz}$ , 2H), 6.77 (dt,  $J = 9.3, 8.2\text{ Hz}$ ,

2H), 4.03 (d,  $J = 5.0$  Hz, 1H), 3.83 (d,  $J = 2.3$  Hz, 7H), 3.77 (dd,  $J = 12.4, 4.0$  Hz, 1H), 3.64 – 3.51 (m, 2H), 3.44 – 3.34 (m, 1H). IR(KBr,  $\nu$ ,  $\text{cm}^{-1}$ ): 3452(w), 1636(s), 1543(s), 1470(s), 1374(m), 1253 (m), 1087(m), 734 (m).

**3. Synthesis of  $\text{Zn}_8\text{Ln}_2$ :** 0.1 mmol (37 mg)  $\text{H}_3\text{L}$  and 0.20 mmol  $\text{NEt}_3$  (27  $\mu\text{L}$ ) were dissolved in 21 mL  $\text{CH}_3\text{CN}$  to obtain a clear yellow  $\text{CH}_3\text{CN}$  solution, then 0.1 mmol (18 mg)  $\text{Zn}(\text{OAc})_2 \cdot 2\text{H}_2\text{O}$  was added to afford a pale yellow suspension. After further stirring for 2 hours, 7 mL  $\text{CH}_3\text{OH}$  was added dropwise to result a clear solution in which 0.1 mmol  $\text{Ln}(\text{OAc})_3 \cdot 6\text{H}_2\text{O}$  was added. The mixture was stirred overnight, filtered into a sealed 10–20 mL glass vial and set aside for slow evaporation. After about one month, pale yellow single crystals suitable for crystal analysis were obtained which were collected by filtration, washed with cold methanol, and dried in the air.

$[\text{Zn}_8\text{Nd}_2\text{L}_2(\text{OH})_4(\text{OAc})_{12}] \cdot 2\text{CH}_3\text{OH} \cdot 2\text{H}_2\text{O}$  ( $\text{Zn}_8\text{Nd}_2$ ) Yield: 55 mg, 45% based on  $\text{H}_3\text{L}$ . Elemental analysis for  $\text{C}_{64}\text{H}_{90}\text{N}_4\text{Nd}_2\text{O}_{44}\text{Zn}_8$ : Calcd.: C 31.62; H 3.73; N 2.30. Found: C 31.72, H 3.75, N 2.28. IR (KBr,  $\nu$ ,  $\text{cm}^{-1}$ ): 3451 (m), 1602 (s), 1554 (s), 1444 (s), 1219 (s), 1081 (m), 852 (m), 742 (m).

$[\text{Zn}_8\text{Tb}_2\text{L}_2(\text{OH})_4(\text{OAc})_{12}] \cdot \text{CH}_3\text{OH} \cdot \text{CH}_3\text{CN}$  ( $\text{Zn}_8\text{Tb}_2$ ) Yield: 60 mg, 49% based on  $\text{H}_3\text{L}$ . Elemental analysis for  $\text{C}_{65}\text{H}_{85}\text{N}_5\text{O}_{41}\text{Tb}_2\text{Zn}_8$ : Calcd.: C 32.08; H 3.52; N 2.88. Found: C 32.48, H 3.54, N 2.85. IR (KBr,  $\nu$ ,  $\text{cm}^{-1}$ ): 3449 (m), 1597 (s), 1553 (s), 1443(s), 1219 (s), 1078 (m), 852 (m), 742 (m).

$[\text{Zn}_8\text{Dy}_2\text{L}_2(\text{OH})_4(\text{OAc})_{12}] \cdot \text{CH}_3\text{OH} \cdot \text{CH}_3\text{CN}$  ( $\text{Zn}_8\text{Dy}_2$ ) Yield: 64 mg, 53% based on  $\text{H}_3\text{L}$ . Elemental analysis for  $\text{C}_{65}\text{H}_{85}\text{Dy}_2\text{N}_4\text{O}_{41}\text{Zn}_8$ : Calcd.: C 38.76; H 3.43; N 8.48. Found: C 38.58, H 3.42, N 8.50. IR (KBr,  $\nu$ ,  $\text{cm}^{-1}$ ): 3449 (m), 1598 (s), 1553 (s), 1445(s), 1221 (s), 1080 (m), 853 (m), 744 (m).

$[\text{Zn}_8\text{Er}_2\text{L}_2(\text{OH})_4(\text{OAc})_{12}] \cdot 2\text{CH}_3\text{CN}$  ( $\text{Zn}_8\text{Er}_2$ ) Yield: 62 mg, 51% based on  $\text{H}_3\text{L}$ . Elemental analysis for  $\text{C}_{66}\text{H}_{84}\text{Er}_2\text{N}_6\text{O}_{39}\text{Zn}_8$ : Calcd.: C 32.45; H 3.47; N 3.44. Found: C 32.48, H 3.46, N 3.42. IR (KBr,  $\nu$ ,  $\text{cm}^{-1}$ ): 3449 (m), 1601 (s), 1553 (s), 1443 (s), 1223 (s), 1080 (m), 852 (m), 742 (m).

**4. Synthesis of  $\text{Ni}_3\text{Tb}_2$**  A similar procedure as that for preparation of  $\text{Zn}_8\text{Tb}_2$  was employed by replacing of  $\text{Zn}(\text{OAc})_2 \cdot 2\text{H}_2\text{O}$  with  $\text{Ni}(\text{OAc}) \cdot 2\text{H}_2\text{O}$ .  $[\text{Ni}_3\text{Tb}_2(\text{HL})_2(\text{OH})_2(\text{OAc})_6] \cdot 3\text{CH}_3\text{CN} \cdot \text{H}_2\text{O}$ , Yield: 52 mg, 58% based on  $\text{H}_3\text{L}$ . Elemental analysis for  $\text{C}_{56}\text{H}_{71}\text{N}_7\text{Ni}_3\text{O}_{27}\text{Tb}_2$ : Calcd.: C 38.04; H 4.05; N 5.55. Found: C 38.29, H 4.03, N 5.59. IR (KBr,  $\nu$ ,  $\text{cm}^{-1}$ ): 3419 (m), 1624 (s), 1559 (s), 1454 (s), 1409 (s), 1313 (m), 1220 (m), 1073 (m), 853 (m), 744 (m).

**5. Synthesis of Ni<sub>2</sub>Tb<sub>2</sub>:** A similar procedure as that for preparation of Ni<sub>3</sub>Tb<sub>2</sub> was adopted by using Tb(NO<sub>3</sub>)<sub>3</sub>·6H<sub>2</sub>O as a lanthanide source. [Ni<sub>2</sub>Tb<sub>2</sub>(HL)<sub>2</sub>(OAc)<sub>4</sub>(NO<sub>3</sub>)<sub>2</sub>(H<sub>2</sub>O)<sub>2</sub>]<sub>4</sub>·4CH<sub>3</sub>CN·3H<sub>2</sub>O, Yield: 40 mg, 45% based on H<sub>3</sub>L. Elemental analysis for C<sub>54</sub>H<sub>74</sub>N<sub>10</sub>Ni<sub>2</sub>O<sub>31</sub>Tb<sub>2</sub>: calcd.: C 36.14, H 4.16, N 7.81, found: C 36.19, H 4.15, N 7.78. IR (KBr, ν, cm<sup>-1</sup>): 3424 (m), 1627 (s), 1575 (s), 1476 (s), 1454 (s), 1409 (s), 1217 (s), 1070 (m), 1028 (m), 852 (m), 744 (m).

## 6. Details of Single Crystal X-ray Diffraction

**X-ray Data Collection and Reduction.** Suitable block crystals of Zn<sub>8</sub>Nd<sub>2</sub>, Zn<sub>8</sub>Tb<sub>2</sub>, Zn<sub>8</sub>Dy<sub>2</sub>, Zn<sub>8</sub>Er<sub>2</sub>, Ni<sub>3</sub>Tb<sub>2</sub> and Ni<sub>2</sub>Tb<sub>2</sub> were coated with perfluoropolyether oil before mounting. Intensity data for the aligned crystals of Zn<sub>8</sub>Tb<sub>2</sub>, Zn<sub>8</sub>Dy<sub>2</sub>, Zn<sub>8</sub>Er<sub>2</sub>, Ni<sub>3</sub>Tb<sub>2</sub> and Ni<sub>2</sub>Tb<sub>2</sub> were recorded at 293(2) K and that of Zn<sub>8</sub>Nd<sub>2</sub> and Ni<sub>3</sub>Tb<sub>2</sub> were recorded at 173 (2) K by employing a Bruker SMART APEX II CCD diffractometer. Mo Kα radiation (λ= 0.71073 Å) source were adopted for Zn<sub>8</sub>Nd<sub>2</sub>, Zn<sub>8</sub>Tb<sub>2</sub>, Zn<sub>8</sub>Dy<sub>2</sub> and Ni<sub>2</sub>Tb<sub>2</sub> and Cu Kα radiation (λ= 1.54184 Å) were used for Zn<sub>8</sub>Er<sub>2</sub> and Ni<sub>3</sub>Tb<sub>2</sub>. No crystal decay was observed during the data collections. The frames were integrated with the Bruker SAINT software package using a narrowframe algorithm. Data were corrected for absorption effects using the empirical multiscan method (SADABS).<sup>2</sup>

**Structure Solution and Refinement.** The structures were solved by direct methods and refined on *F*<sup>2</sup> by a full-matrix least-squares procedure. SHELXL-2014/2016 was used for both structure solutions and refinements.<sup>3</sup> The locations of the heaviest atoms were determined easily. The O, N, and C atoms were subsequently determined from the difference Fourier maps and refined anisotropically. The H atoms were incorporated at calculated positions and refined with fixed geometry and riding thermal parameters with respect to their carrier atoms. Crystallographic diagrams were drawn using the DIAMOND software package.<sup>4</sup> Also severely disordered solvents molecules in Zn<sub>8</sub>Tb<sub>2</sub>, Zn<sub>8</sub>Dy<sub>2</sub>, Ni<sub>3</sub>Tb<sub>2</sub> and Ni<sub>2</sub>Tb<sub>2</sub> were removed by SQUEEZE during the structural refinements.<sup>5</sup> For details about the squeezed material, see cif data in Supporting Information. Therefore, solvent molecules which were determined on the basis of elemental microanalysis, thermal analysis and the data treated with the SQUEEZE routine within PLATON were added to the molecular formula of Zn<sub>8</sub>Tb<sub>2</sub>, Zn<sub>8</sub>Dy<sub>2</sub>, Ni<sub>3</sub>Tb<sub>2</sub> and Ni<sub>2</sub>Tb<sub>2</sub> respectively.

**Table S1.** Selected bond lengths (Å) for **Zn<sub>8</sub>Nd<sub>2</sub>**, **Zn<sub>8</sub>Tb<sub>2</sub>**, **Zn<sub>8</sub>Dy<sub>2</sub>**, **Zn<sub>8</sub>Er<sub>2</sub>**, **Ni<sub>3</sub>Tb<sub>2</sub>** and **Ni<sub>2</sub>Tb<sub>2</sub>**.

| <b>[Zn<sub>8</sub>Nd<sub>2</sub>L<sub>2</sub>(OH)<sub>4</sub>(OAc)<sub>12</sub>]·CH<sub>3</sub>OH·H<sub>2</sub>O (Zn<sub>8</sub>Nd<sub>2</sub>)</b>                                             |          |         |          |         |          |         |          |         |          |
|-------------------------------------------------------------------------------------------------------------------------------------------------------------------------------------------------|----------|---------|----------|---------|----------|---------|----------|---------|----------|
| Nd1–O1                                                                                                                                                                                          | 2.714(4) | Nd1–O2  | 2.401(4) | Nd1–O4  | 2.431(4) | Nd1–O5  | 2.432(4) | Nd1–O7  | 2.515(3) |
| Nd1–O8                                                                                                                                                                                          | 2.505(3) | Nd1–O13 | 1.595(4) | Nd1–O15 | 2.418(4) | Nd1–O17 | 2.419(3) | Zn1–O3  | 1.936(3) |
| Zn1–O7                                                                                                                                                                                          | 1.940(3) | Zn1–O16 | 1.954(3) | Zn1–O19 | 2.024(3) | Zn2–N1  | 2.048(4) | Zn2–O2  | 2.034(3) |
| Zn2–O3                                                                                                                                                                                          | 2.058(3) | Zn2–O7  | 2.018(3) | Zn2–O20 | 2.033(4) | Zn3–O5  | 2.023(4) | Zn3–O6  | 2.219(4) |
| Zn3–O8                                                                                                                                                                                          | 2.040(3) | Zn3–O9  | 1.982(4) | Zn3–O14 | 1.962(4) | Zn4–O8  | 1.940(3) | Zn4–O10 | 1.986(4) |
| Zn4–O12                                                                                                                                                                                         | 1.920(4) | Zn4–O18 | 1.939(4) |         |          |         |          |         |          |
| <b>[Zn<sub>8</sub>Tb<sub>2</sub>L<sub>2</sub>(OH)<sub>4</sub>(OAc)<sub>12</sub>]·CH<sub>3</sub>OH·CH<sub>3</sub>CN (Zn<sub>8</sub>Tb<sub>2</sub>)</b>                                           |          |         |          |         |          |         |          |         |          |
| Tb1–O1                                                                                                                                                                                          | 2.715(6) | Tb1–O2  | 2.451(6) | Tb1–O4  | 2.470(5) | Tb1–O5  | 2.481(6) | Tb1–O10 | 2.474(6) |
| Tb1–O12                                                                                                                                                                                         | 2.602(6) | Tb1–O17 | 2.469(6) | Tb1–O19 | 2.551(5) | Tb1–O20 | 2.572(5) | Zn1–O3  | 1.923(5) |
| Zn1–O7                                                                                                                                                                                          | 2.012(5) | Zn1–O9  | 1.953(6) | Zn1–O20 | 1.937(5) | Zn2–N1  | 2.037(7) | Zn2–O2  | 2.032(5) |
| Zn2–O3                                                                                                                                                                                          | 2.058(5) | Zn2–O8  | 2.027(6) | Zn2–O20 | 2.010(5) | Zn3–O5  | 2.012(5) | Zn3–O6  | 2.212(6) |
| Zn3–O11                                                                                                                                                                                         | 1.960(6) | Zn3–O13 | 1.973(6) | Zn3–O19 | 2.030(5) | Zn4–O14 | 1.982(7) | Zn4–O16 | 1.917(6) |
| Zn4–O18                                                                                                                                                                                         | 1.941(6) | Zn4–O19 | 1.929(6) |         |          |         |          |         |          |
| <b>[Zn<sub>8</sub>Dy<sub>2</sub>L<sub>2</sub>(OH)<sub>4</sub>(OAc)<sub>12</sub>]·CH<sub>3</sub>OH·CH<sub>3</sub>CN (Zn<sub>8</sub>Dy<sub>2</sub>)</b>                                           |          |         |          |         |          |         |          |         |          |
| Dy1–O1                                                                                                                                                                                          | 2.715(5) | Dy1–O2  | 2.415(5) | Dy1–O4  | 2.444(5) | Dy1–O5  | 2.433(5) | Dy1–O10 | 2.438(5) |
| Dy1–O11                                                                                                                                                                                         | 2.531(4) | Dy1–O13 | 2.632(5) | Dy1–O19 | 2.440(4) | Dy1–O20 | 2.527(4) | Zn1–O3  | 1.941(4) |
| Zn1–O8                                                                                                                                                                                          | 2.017(5) | Zn1–O9  | 1.958(4) | Zn1–O11 | 1.950(4) | Zn2–N1  | 2.041(6) | Zn2–O2  | 2.041(4) |
| Zn2–O3                                                                                                                                                                                          | 2.056(4) | Zn2–O7  | 2.036(5) | Zn2–O11 | 2.014(4) | Zn3–O5  | 2.032(5) | Zn3–O6  | 2.203(6) |
| Zn3–O12                                                                                                                                                                                         | 1.964(6) | Zn3–O14 | 1.979(5) | Zn3–O20 | 2.030(5) | Zn4–O15 | 1.994(5) | Zn4–O16 | 1.933(5) |
| Zn4–O18                                                                                                                                                                                         | 1.949(5) | Zn4–O20 | 1.947(4) |         |          |         |          |         |          |
| <b>[Zn<sub>8</sub>Er<sub>2</sub>L<sub>2</sub>(OH)<sub>4</sub>(OAc)<sub>12</sub>]·2CH<sub>3</sub>CN (Zn<sub>8</sub>Er<sub>2</sub>)</b>                                                           |          |         |          |         |          |         |          |         |          |
| Er1–O2                                                                                                                                                                                          | 2.343(6) | Er1–O3  | 2.387(5) | Er1–O5  | 2.300(5) | Er1–O6  | 2.711(5) | Er1–O8  | 2.349(5) |
| Er1–O9                                                                                                                                                                                          | 2.590(6) | Er1–O16 | 2.323(5) | Er1–O19 | 2.411(5) | Er1–O20 | 2.432(4) | Zn1–O1  | 2.247(7) |
| Zn1–O2                                                                                                                                                                                          | 2.033(5) | Zn1–O10 | 1.953(6) | Zn1–O11 | 2.000(6) | Zn1–O19 | 2.062(5) | Zn2–N2  | 2.034(6) |
| Zn2–O4                                                                                                                                                                                          | 2.057(4) | Zn2–O5  | 2.047(4) | Zn2–O7  | 2.053(5) | Zn2–O20 | 2.010(4) | Zn3–O12 | 1.990(8) |
| Zn3–O13                                                                                                                                                                                         | 1.941(7) | Zn3–O15 | 1.954(7) | Zn3–O19 | 1.931(5) | Zn4–O4  | 1.923(4) | Zn4–O17 | 2.028(5) |
| Zn4–O18                                                                                                                                                                                         | 1.965(5) | Zn4–O20 | 1.939(4) |         |          |         |          |         |          |
| <b>[Ni<sub>3</sub>Tb<sub>2</sub>(HL)<sub>2</sub>(OH)<sub>2</sub>(OAc)<sub>6</sub>]·3CH<sub>3</sub>CN·H<sub>2</sub>O (Ni<sub>3</sub>Tb<sub>2</sub>)</b>                                          |          |         |          |         |          |         |          |         |          |
| Tb1–O1                                                                                                                                                                                          | 2.533(3) | Tb1–O2  | 2.292(3) | Tb1–O7  | 2.659(3) | Tb1–O8  | 2.309(3) | Tb1–O13 | 2.319(3) |
| Tb1–O15                                                                                                                                                                                         | 2.311(3) | Tb1–O24 | 2.381(3) | Tb1–O25 | 2.357(3) | Tb2–O5  | 2.321(3) | Tb2–O6  | 2.648(3) |
| Tb2–O11                                                                                                                                                                                         | 2.289(3) | Tb2–O12 | 2.616(3) | Tb2–O18 | 2.386(3) | Tb2–O20 | 2.286(3) | Tb2–O22 | 2.300(3) |
| Tb2–O26                                                                                                                                                                                         | 2.348(3) | Ni1–N2  | 2.008(4) | Ni1–O4  | 2.103(3) | Ni1–O5  | 2.000(3) | Ni1–O19 | 2.108(3) |
| Ni1–O23                                                                                                                                                                                         | 2.091(3) | Ni1–O26 | 2.018(3) | Ni2–O16 | 2.065(3) | Ni2–O18 | 2.115(3) | Ni2–O21 | 2.071(3) |
| Ni2–O24                                                                                                                                                                                         | 2.125(3) | Ni2–O25 | 2.008(3) | Ni2–O26 | 2.001(3) | Ni3–N3  | 2.007(4) | Ni3–O8  | 2.004(3) |
| Ni3–O9                                                                                                                                                                                          | 2.121(3) | Ni3–O14 | 2.104(3) | Ni3–O17 | 2.091(3) | Ni3–O25 | 2.010(3) |         |          |
| <b>[Ni<sub>2</sub>Tb<sub>2</sub>(HL)<sub>2</sub>(OAc)<sub>4</sub>(NO<sub>3</sub>)<sub>2</sub>(H<sub>2</sub>O)<sub>2</sub>]·4CH<sub>3</sub>CN·3H<sub>2</sub>O (Ni<sub>2</sub>Tb<sub>2</sub>)</b> |          |         |          |         |          |         |          |         |          |
| Tb1–O1                                                                                                                                                                                          | 2.638(4) | Tb1–O2  | 2.297(4) | Tb1–O5  | 2.347(4) | Tb1–O6  | 2.498(4) | Tb1–O7  | 2.426(4) |
| Tb1–O8                                                                                                                                                                                          | 2.402(4) | Tb1–O9  | 2.361(4) | Tb1–O11 | 2.456(5) | Tb1–O12 | 2.500(5) | Ni1–N1  | 2.042(5) |
| Ni1–O2                                                                                                                                                                                          | 2.010(4) | Ni1–O4  | 2.030(4) | Ni1–O5  | 2.020(4) | Ni1–O10 | 2.101(4) | Ni1–O14 | 2.080(5) |

Table S2 Shape calculation of Ln<sup>III</sup> in **Zn<sub>8</sub>Nd<sub>2</sub>**, **Zn<sub>8</sub>Tb<sub>2</sub>**, **Zn<sub>8</sub>Dy<sub>2</sub>**, **Zn<sub>8</sub>Er<sub>2</sub>**, **Ni<sub>3</sub>Tb<sub>2</sub>** and **Ni<sub>2</sub>Tb<sub>2</sub>**.

|                                                   | <b>Zn<sub>8</sub>Nd<sub>2</sub></b> | <b>Zn<sub>8</sub>Tb<sub>2</sub></b> | <b>Zn<sub>8</sub>Dy<sub>2</sub></b> | <b>Zn<sub>8</sub>Er<sub>2</sub></b> | <b>Ni<sub>3</sub>Tb<sub>2</sub></b> | <b>Ni<sub>2</sub>Tb<sub>2</sub></b> |               |
|---------------------------------------------------|-------------------------------------|-------------------------------------|-------------------------------------|-------------------------------------|-------------------------------------|-------------------------------------|---------------|
| Enneagon (EP-9)                                   | 0.2010                              | 0.1973                              | 0.2007                              | 0.2558                              | –                                   | –                                   | 0.2203        |
| Octagonal pyramid (OPY-9)                         | 0.1318                              | 0.1341                              | 0.1329                              | 0.1387                              | –                                   | –                                   | 0.2112        |
| Heptagonal bipyramid (HBPY-9)                     | 0.2222                              | 0.2273                              | 0.2260                              | 0.2146                              | –                                   | –                                   | 0.2251        |
| Johnson triangular cupola J3 (JTC-9)              | 0.1752                              | 0.1727                              | 0.1751                              | 0.1771                              | –                                   | –                                   | 0.1779        |
| Capped cube J8 (JCCU-9)                           | 0.1675                              | 0.1669                              | 0.1659                              | 0.1628                              | –                                   | –                                   | <b>0.1254</b> |
| Spherical-relaxed capped cube (CCU-9)             | 0.1785                              | 0.1786                              | 0.1779                              | 0.1641                              | –                                   | –                                   | 0.1579        |
| Capped square antiprism J10 (JCSAPR-9)            | 0.1138                              | 0.1184                              | 0.1168                              | 0.0973                              | –                                   | –                                   | 0.1427        |
| Spherical capped square antiprism (CSAPR-9)       | 0.1074                              | 0.1107                              | 0.1096                              | 0.0932                              | –                                   | –                                   | 0.1675        |
| Tricapped trigonal prism J51 (JTCTPR-9)           | 0.1098                              | 0.1135                              | 0.1104                              | 0.0926                              | –                                   | –                                   | 0.1496        |
| Spherical tricapped trigonal prism (TCTPR-9)      | 0.1050                              | 0.1079                              | 0.1081                              | 0.9790                              | –                                   | –                                   | 0.1692        |
| Tridiminished icosahedron J63 (JTDIC-9)           | 0.1762                              | 0.1736                              | 0.1760                              | 0.1643                              | –                                   | –                                   | 0.1899        |
| Hula-hoop (HH-9)                                  | 0.1790                              | 0.1806                              | 0.1804                              | 0.1686                              | –                                   | –                                   | 0.1480        |
| Muffin (MFF-9)                                    | <b>0.1007</b>                       | <b>0.1031</b>                       | <b>0.1024</b>                       | <b>0.0893</b>                       | –                                   | –                                   | 0.1534        |
| Octagon (OP-8)                                    | –                                   | –                                   | –                                   | –                                   | 0.2259                              | 0.2565                              | –             |
| Heptagonal pyramid (HPY-8)                        | –                                   | –                                   | –                                   | –                                   | 0.1882                              | 0.2053                              | –             |
| Hexagonal bipyramid (BPY-8)                       | –                                   | –                                   | –                                   | –                                   | 0.1892                              | 0.2016                              | –             |
| Cube (CU-8)                                       | –                                   | –                                   | –                                   | –                                   | 0.1895                              | 0.2004                              | –             |
| Square antiprism (SAPR-8)                         | –                                   | –                                   | –                                   | –                                   | 0.0778                              | 0.0973                              | –             |
| Triangular dodecahedron (TDD-8)                   | –                                   | –                                   | –                                   | –                                   | 0.0793                              | 0.0874                              | –             |
| Johnson gyrobifastigium (JGBF-8)                  | –                                   | –                                   | –                                   | –                                   | 0.1559                              | 0.1774                              | –             |
| Johnson elongated triangular bipyramid (JETBPY-8) | –                                   | –                                   | –                                   | –                                   | 0.1947                              | 0.2072                              | –             |
| Biaugmented trigonal prism J50 (JBTPR-8)          | –                                   | –                                   | –                                   | –                                   | <b>0.0626</b>                       | <b>0.0693</b>                       | –             |
| Biaugmented trigonal prism (BTPR-8)               | –                                   | –                                   | –                                   | –                                   | 0.0764                              | 0.0763                              | –             |
| Snub diphenoid J84 (JSD-8)                        | –                                   | –                                   | –                                   | –                                   | 0.0740                              | 0.0886                              | –             |
| Triakis tetrahedron (TT-8)                        | –                                   | –                                   | –                                   | –                                   | 0.1907                              | 0.2049                              | –             |
| Elongated trigonal bipyramid (ETBPY-8)            | –                                   | –                                   | –                                   | –                                   | 0.1805                              | 0.2260                              | –             |

**Table S3.** H-bond parameters in **Zn<sub>8</sub>Nd<sub>2</sub>**, **Ni<sub>3</sub>Tb<sub>2</sub>** and **Ni<sub>2</sub>Tb<sub>2</sub>**.

| Complex                             | D–H···A        | <i>d</i> (D–H) | <i>d</i> (H···A) | <i>d</i> (D···A) | ∠D–H···A  | Symmetry code        |
|-------------------------------------|----------------|----------------|------------------|------------------|-----------|----------------------|
| <b>Zn<sub>8</sub>Nd<sub>2</sub></b> | N2–H2···O21    | 0.859(5)       | 2.008(1)         | 2.844(9)         | 164.43(2) | 1-x, 2-y, 2-z        |
|                                     | O21–H21···O11  | 0.821(2)       | 1.909(3)         | 2.687(3)         | 157.70(6) | 1-x, 1.5+y, 2.5-z    |
|                                     | O22–H22B···O11 | 0.875(3)       | 1.942(4)         | 2.799(2)         | 165.77(3) | 1-x, 1.5+y, 2.5-z    |
|                                     | O22–H22B···O8  | 0.750(2)       | 2.006(7)         | 2.753(9)         | 173.97(0) | 1-x, 1.5+y, 2.5-z    |
| <b>Ni<sub>3</sub>Tb<sub>2</sub></b> | O9–H9···O10    | 0.862(1)       | 1.948(3)         | 2.709(4)         | 146.49(4) | 2-x, 1-y, 1-z        |
|                                     | O4–H4B···O3    | 0.887(8)       | 1.851(7)         | 2.696(2)         | 158.16(9) | 1-x, -y, -z          |
|                                     | O27–H27B···O3  | 0.849(8)       | 2.237(4)         | 3.035(5)         | 156.45(9) | 1-x, -y, -z          |
|                                     | O26–H26···O27  | 0.980(2)       | 2.044(3)         | 2.959(9)         | 154.69(4) | x, y, z              |
| <b>Ni<sub>2</sub>Tb<sub>2</sub></b> | N2–H2···O3     | 0.861(3)       | 2.068(8)         | 2.858(8)         | 152.20(2) | 1-x, 1-y, 1-z        |
|                                     | O14–H14A···O15 | 0.855(3)       | 1.854(5)         | 2.687(6)         | 164.2(1)  | 1-x, 1-y, 1-z        |
|                                     | O15–H15A···O7  | 0.809(9)       | 1.996(1)         | 2.761(9)         | 157.50(6) | 1-x, 1-y, 1-z        |
|                                     | O15–H15B···O8  | 0.819(6)       | 1.974(8)         | 2.787(2)         | 171.02(8) | -0.5+x, 1.5-y, 0.5+z |





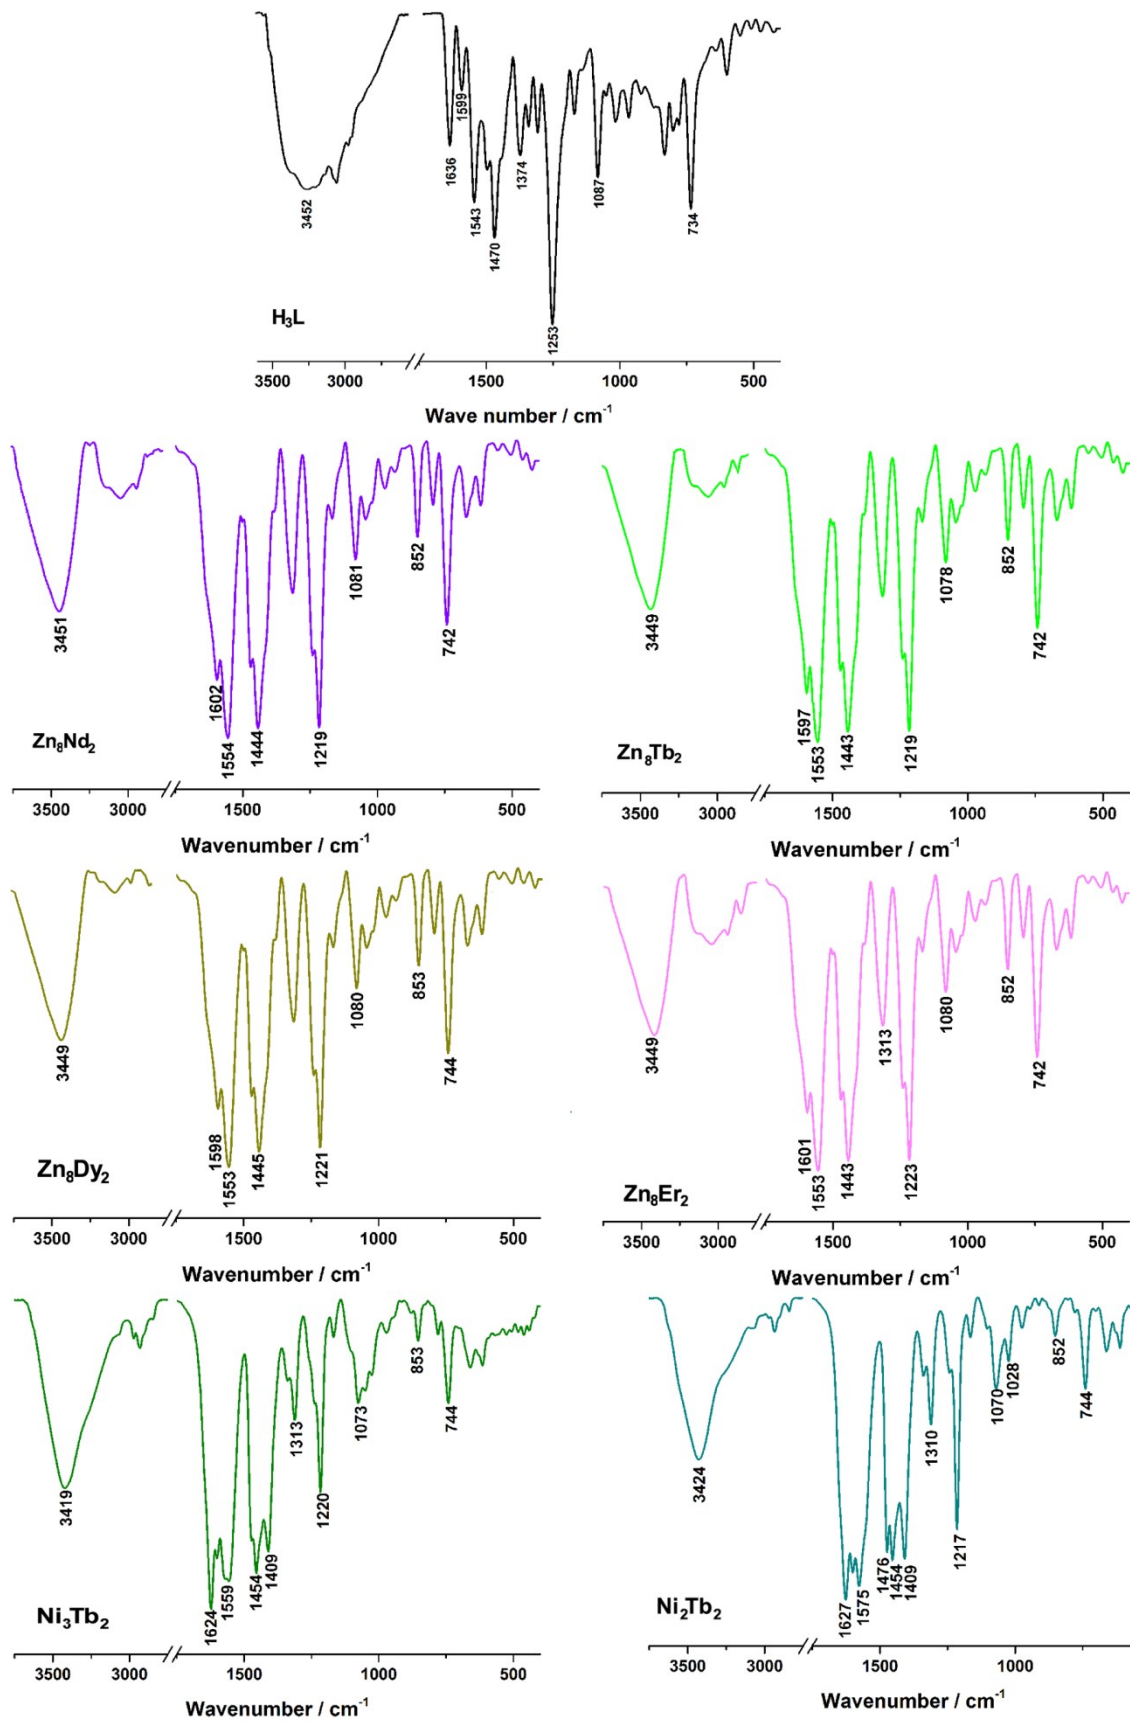

Figure S2. IR spectra of  $\text{H}_3\text{L}$ ,  $\text{Zn}_8\text{Nd}_2$ ,  $\text{Zn}_8\text{Tb}_2$ ,  $\text{Zn}_8\text{Dy}_2$ ,  $\text{Zn}_8\text{Er}_2$ ,  $\text{Ni}_3\text{Tb}_2$  and  $\text{Ni}_2\text{Tb}_2$  in solid state.

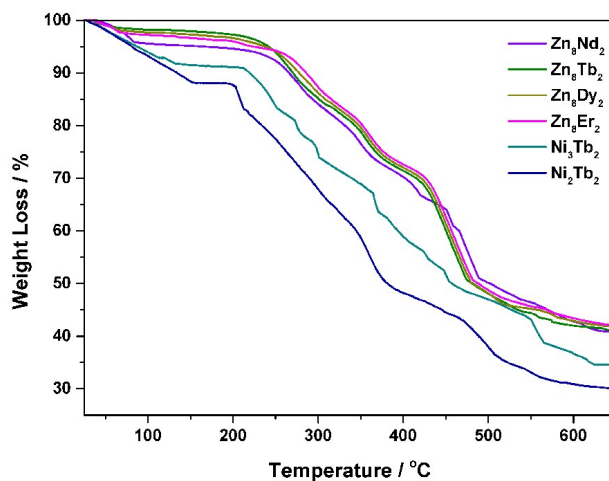

Figure S3. TGA curves of  $Zn_8Nd_2$ ,  $Zn_8Tb_2$ ,  $Zn_8Dy_2$ ,  $Zn_8Er_2$ ,  $Ni_3Tb_2$  and  $Ni_2Tb_2$  from 25 ~ 650 °C.

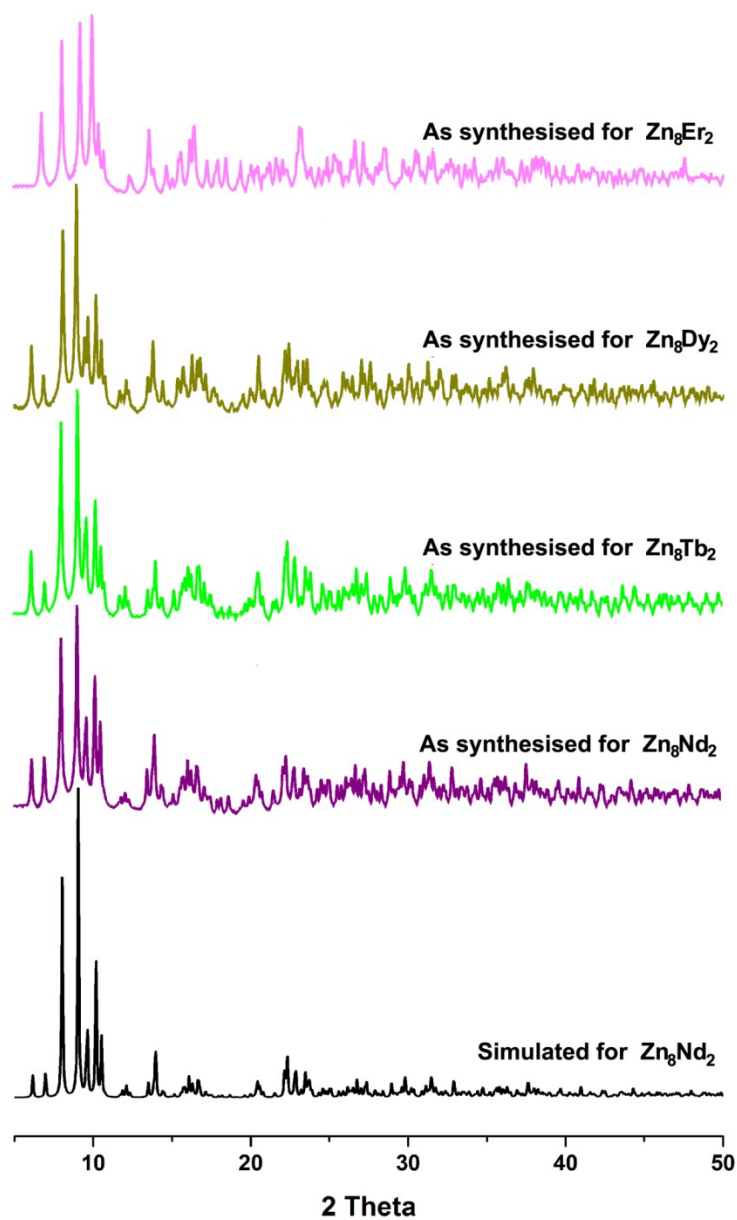

Figure S4. PXRD patterns of synthesized and simulated  $Zn_8Nd_2$ ,  $Zn_8Tb_2$ ,  $Zn_8Dy_2$  and  $Zn_8Er_2$ .

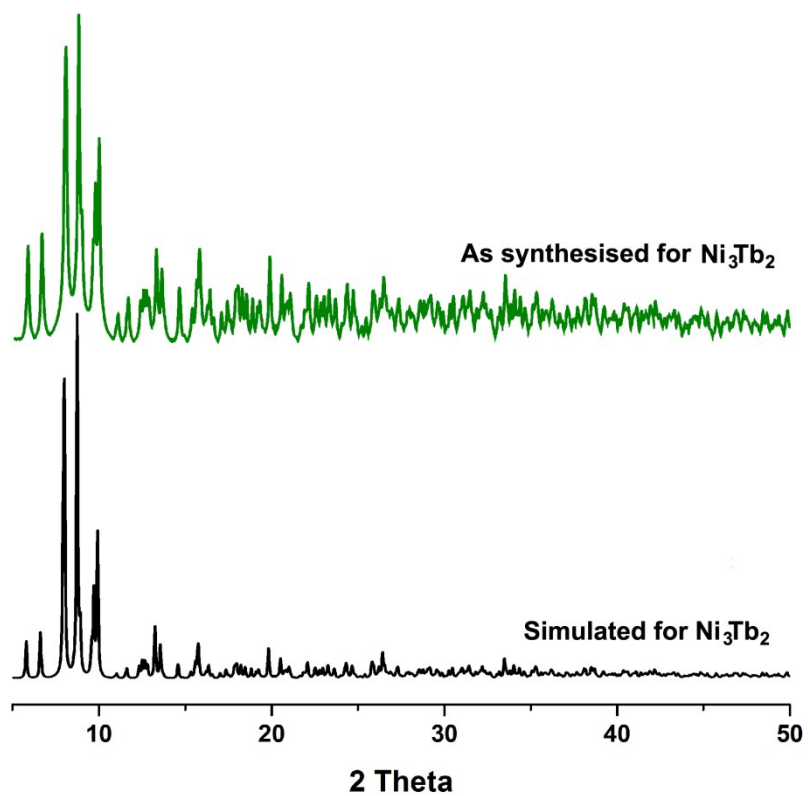

Figure S5. PXRD patterns of synthesized and simulated  $\text{Ni}_3\text{Tb}_2$ .

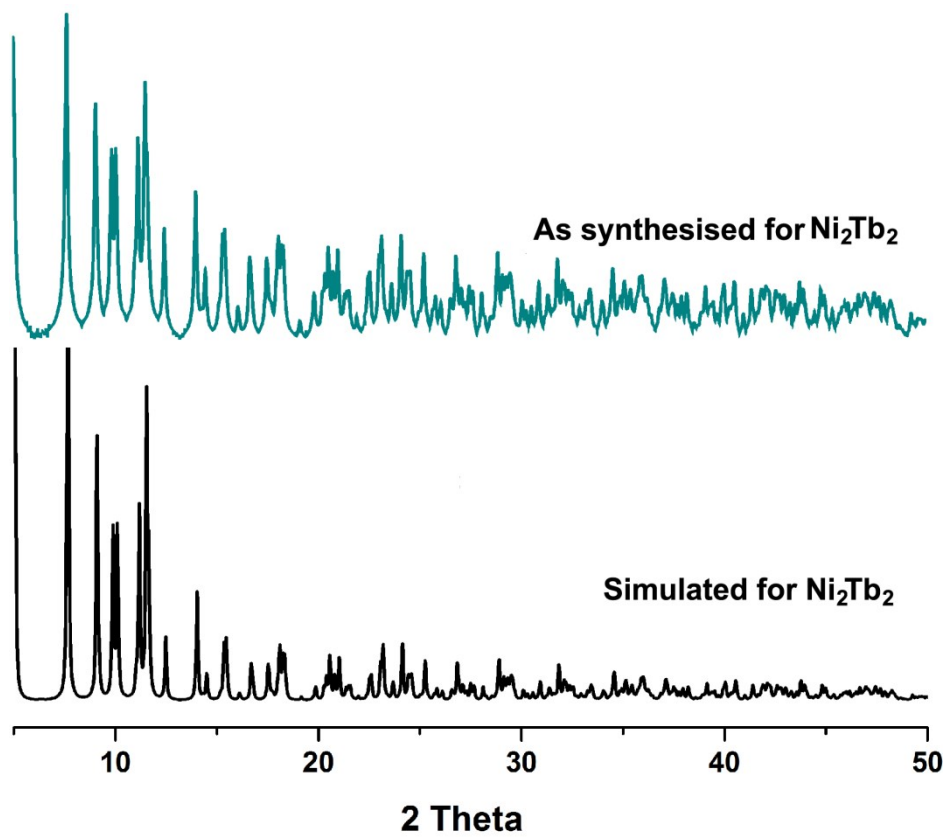

Figure S6. PXRD patterns of synthesized and simulated  $\text{Ni}_2\text{Tb}_2$ .

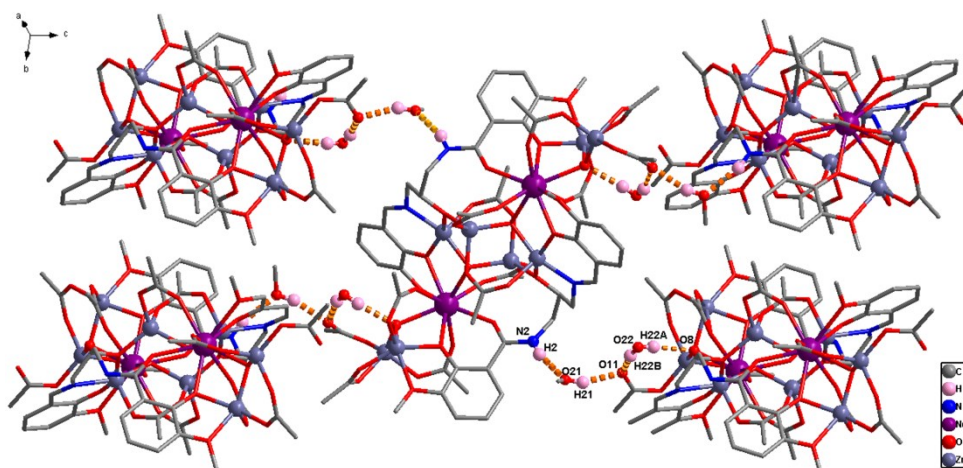

Figure S7 2D Supramolecular architecture of  $Zn_3Nd_2$  constructed by intermolecular H-bond.

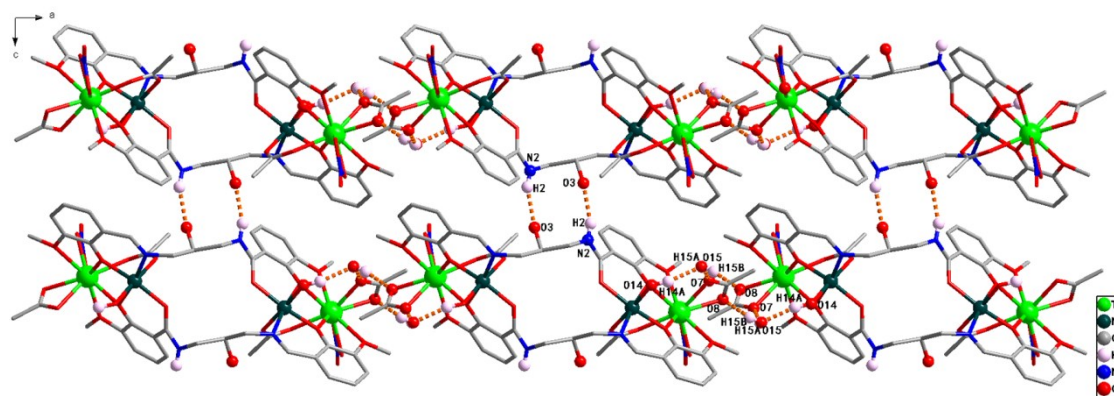

Figure S8 3D supramolecular network of  $Ni_2Tb_2$  constructed by intermolecular H-bond viewing along b-axis.

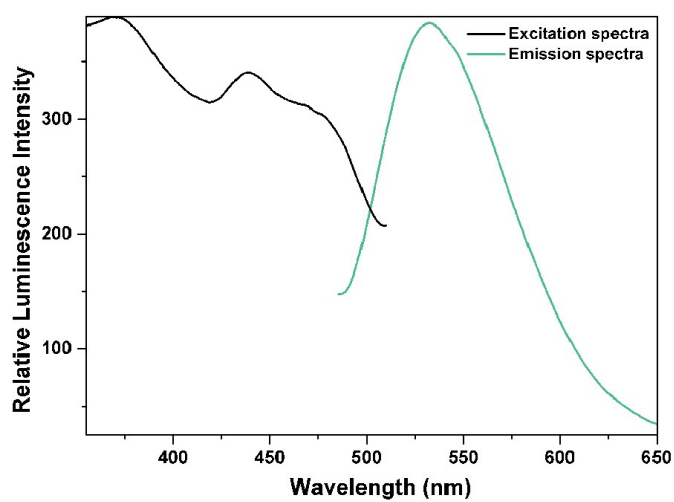

Figure S9 Excitation and emission spectra of  $H_3L$  in solid state.

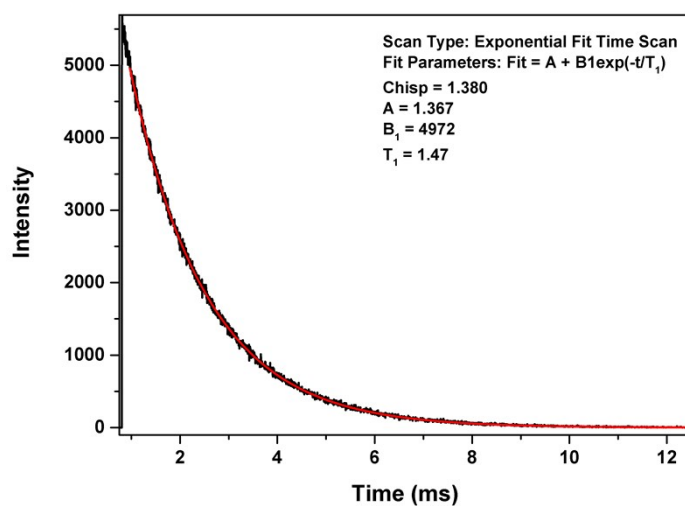

Figure S10 Emission intensity decay curves of  $\text{Zn}_8\text{Tb}_2$  in solid state monitored at 546 nm.

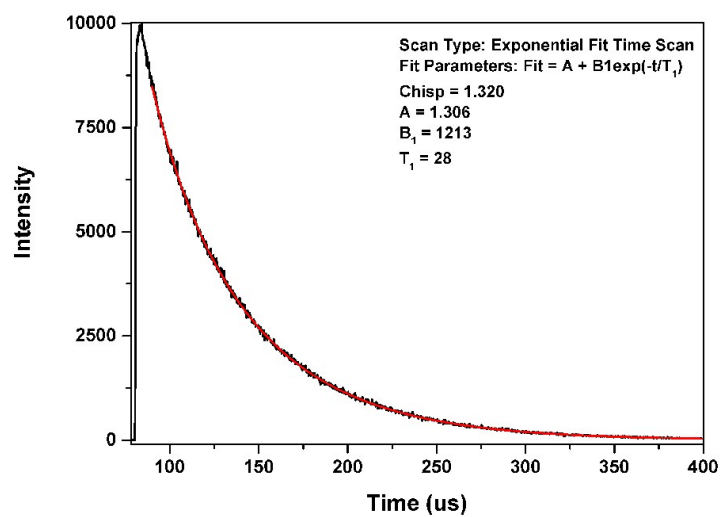

Figure S11 Emission intensity decay curves of  $\text{Zn}_8\text{Dy}_2$  in solid state monitored at 484 nm.

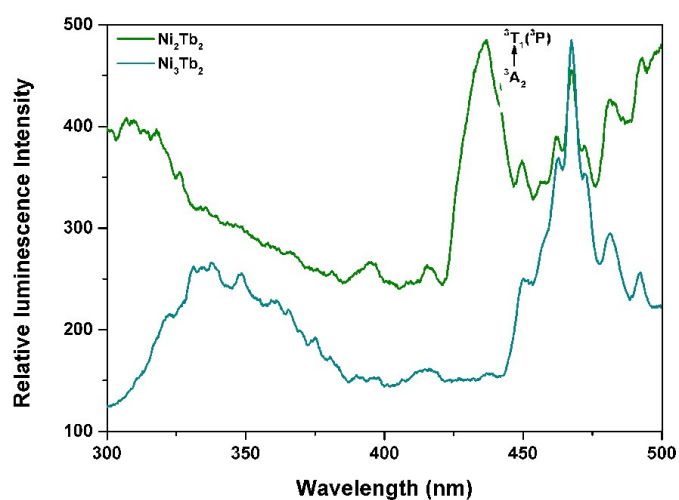

Figure S12 Excitation spectra of  $\text{Ni}_3\text{Tb}_2$  and  $\text{Ni}_2\text{Tb}_2$  monitored at 546 nm.

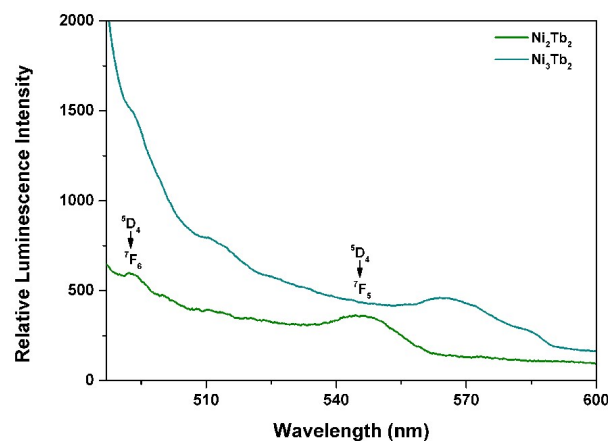

Figure S13 Emission spectra of  $\text{Ni}_3\text{Tb}_2$  and  $\text{Ni}_2\text{Tb}_2$  upon excited at 467nm.

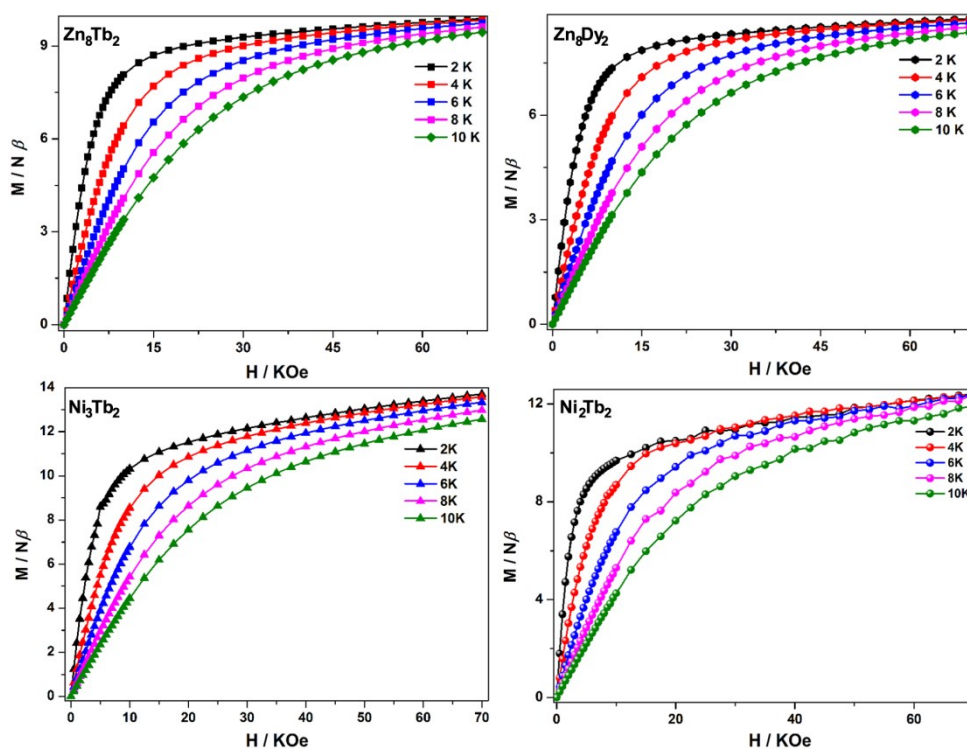

Figure S14 M-H curves of  $\text{Zn}_8\text{Tb}_2$ ,  $\text{Zn}_8\text{Dy}_2$ ,  $\text{Ni}_3\text{Tb}_2$  and  $\text{Ni}_2\text{Tb}_2$ .

## Reference

- 1 Y. -A. Liu, C. -Y. Wang, M. Zhang, X. -Q. Song, *Polyhedron*, 2017, *127*, 278-286.
- 2 SADABS, version 2.03; Bruker AXS Inc. Madison, WI, 2002.
- 3 G. M. Sheldrick, SHELXL-1997; University of Gottingen: Gottingen, Germany, 2014.
- 4 DIAMOND, Visual Crystal Structure Information System, version 3.1; Crystal Impact: Bonn, Germany, 2004.
- 5 A. L. Spek, The calculation of the solvent-accessible was performed by using the PLATON software (similarly herein after) *J. Appl. Crystallogr.* 2003, *36*, 7.
